# Supplementary material
Source: Research Square preprint supplement (doi:10.21203/rs.3.rs-9097051/v1)
Supplement: Supplementary file 1 [file e1f5b2542aa9806011a45437.docx]

Supplementary Materials

**Uncovering the spatiotemporal patterns of the largest vaccine-derived poliovirus serotype 2 outbreak in the Democratic Republic of the Congo**

Kieran Chopra1*, Tresor Kabeya Mampuela2,3*, Alexander Shaw1, David Jorgensen1, Javier Martin4, Catherine Pratt5, Emmanuel Lokilo Lofiko3, Philippe Lemey6, Yogolelo Riziki3, Nicholas C. Grassly1, Placide Mbala2,3,7,8, Isobel Blake1, Darlan da Silva Candido1

Authors marked with an * contributed equally

**Affiliations:**

1MRC Centre for Global Infectious Disease Analysis, School of Public Health, Imperial College, London, United Kingdom

2Service de Microbiologie, Departement de Biologie Médicale, Cliniques Universitaires de Kinshasa (CUK), Université de Kinshasa (UNIKIN), Kinshasa, Democratic Republic of the Congo

3Institut National de Recherche Biomédicale, Kinshasa, Democratic Republic of the Congo

4Division of Vaccines, National Institute for Biological Standards and Control, Medicines and Healthcare products Regulatory Agency, Potters Bar, UK.

5Biosurv International, Salisbury, UK.

6Department of Microbiology, Immunology and Transplantation, Rega Institute, KU Leuven, Leuven, Belgium

7South African National Bioinformatics Institute, University of the Western Cape, South Africa

8Dept of Virology, Graduate School of Medicine, Osaka Metropolitan University, Japan.*Corresponding author. Email: [ddasilva@ic.ac.uk](mailto:ddasilva@ic.ac.uk)


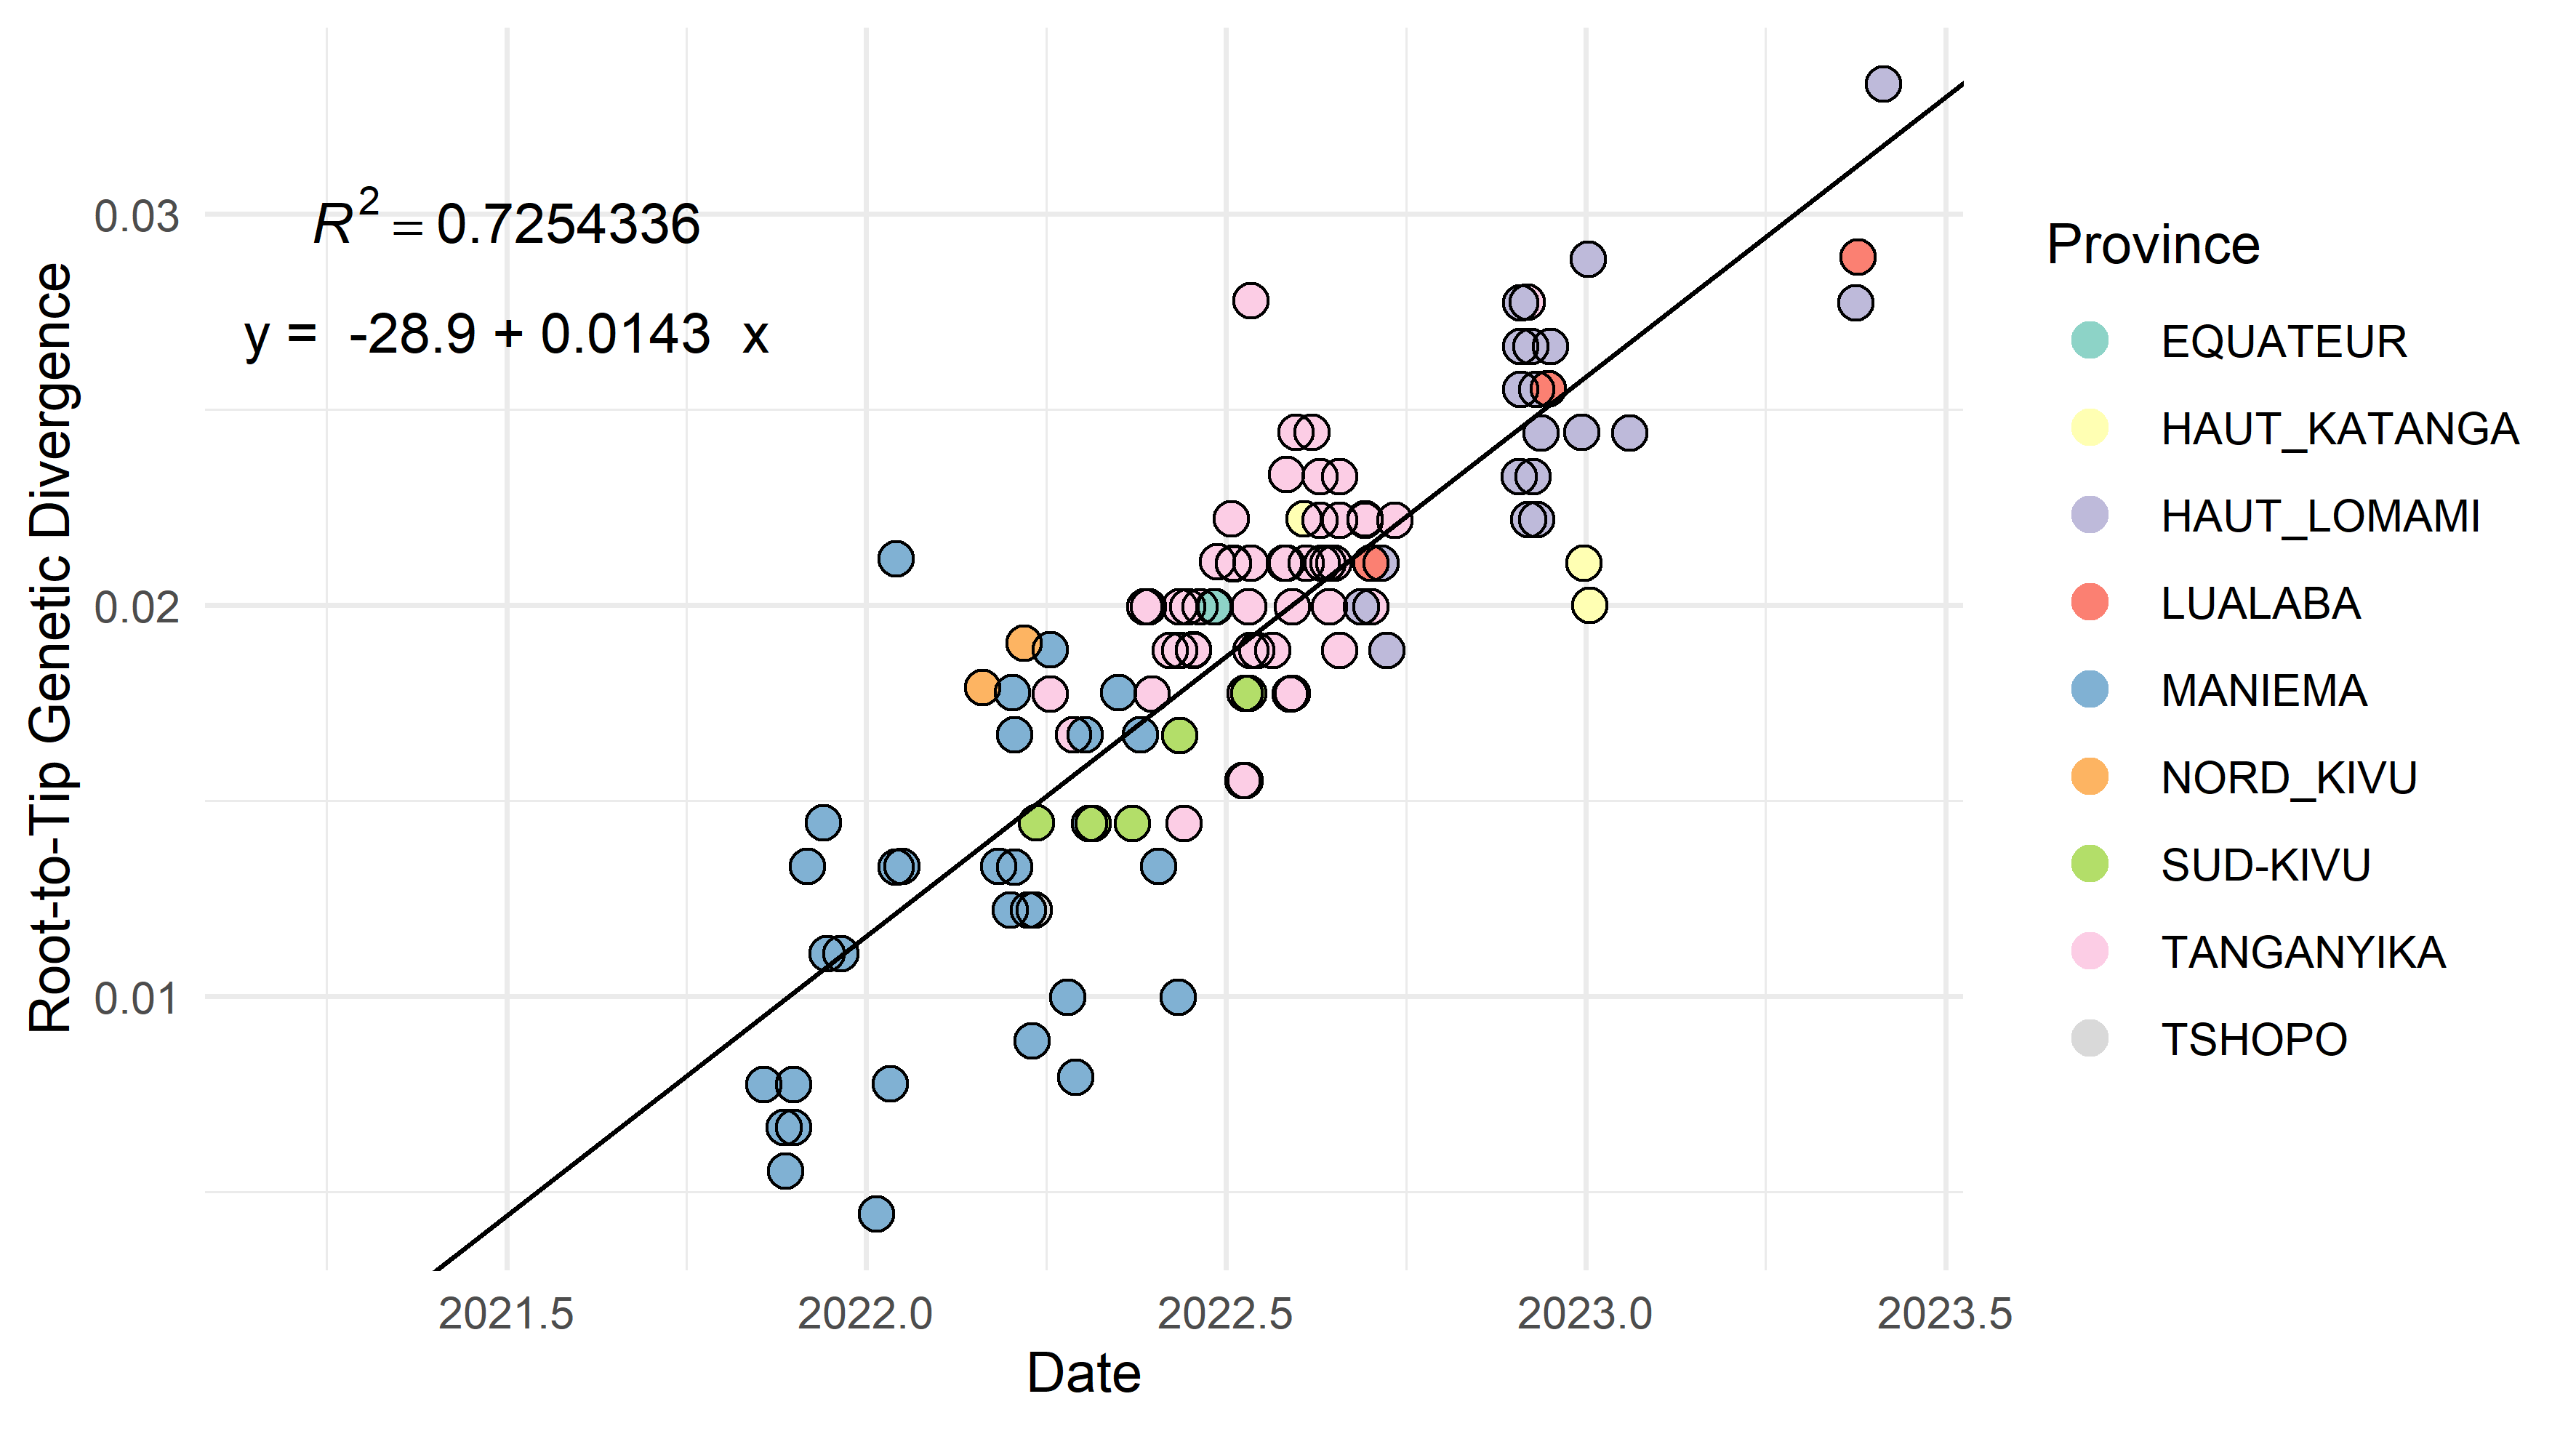


Supplementary Figure 1: Root-to-tip regression analysis of RDC-MAN-3 DDNS sequences (VP1 gene) demonstrating a strong temporal signal


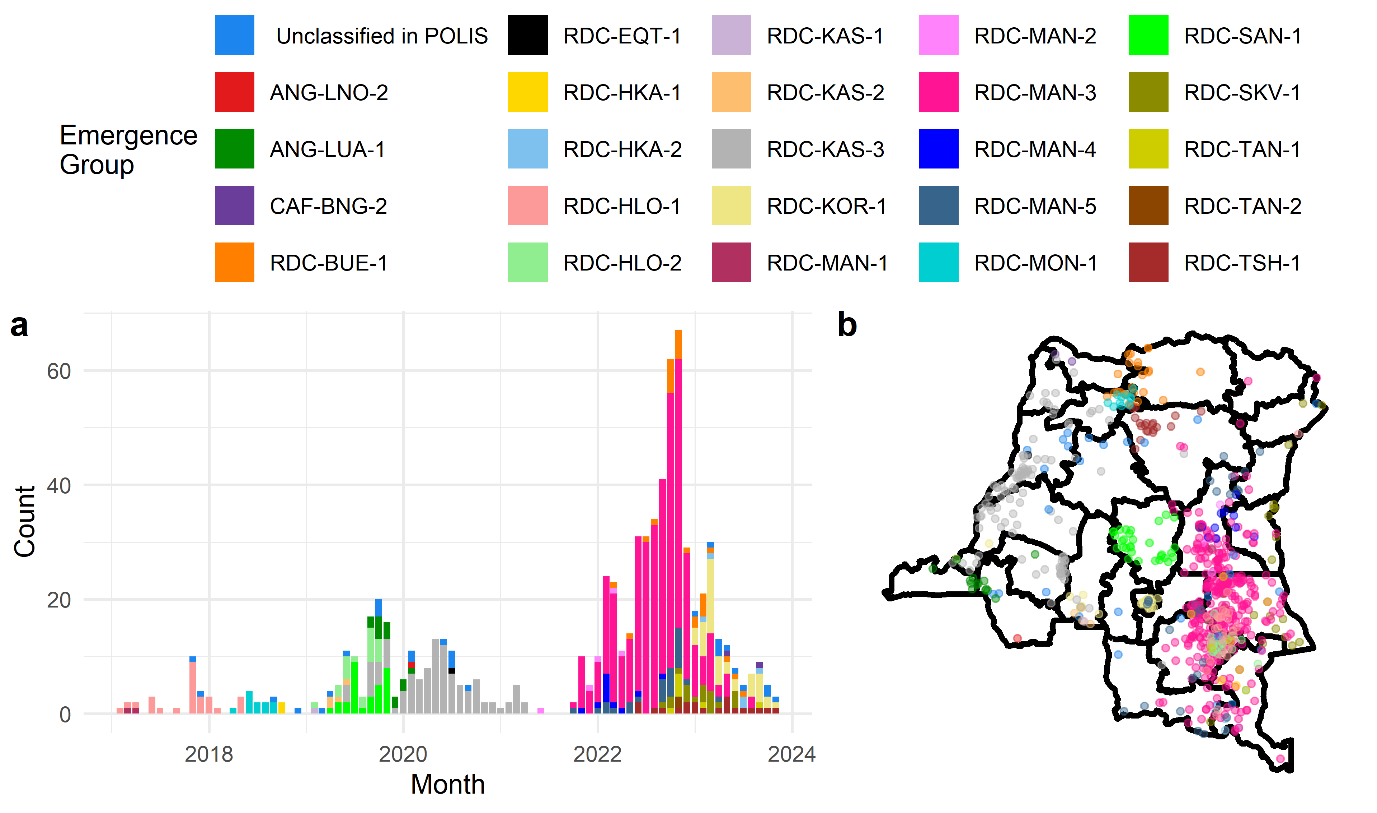


Supplementary Figure 2: cVDPV2 epidemiology in the DRC. (a) Time series of cVDPV2 cases confirmed by gold standard testing in the DRC between 2017 and 2024. (b) A map of the same cVDPV2 cases – locations are accurate to the nearest district.


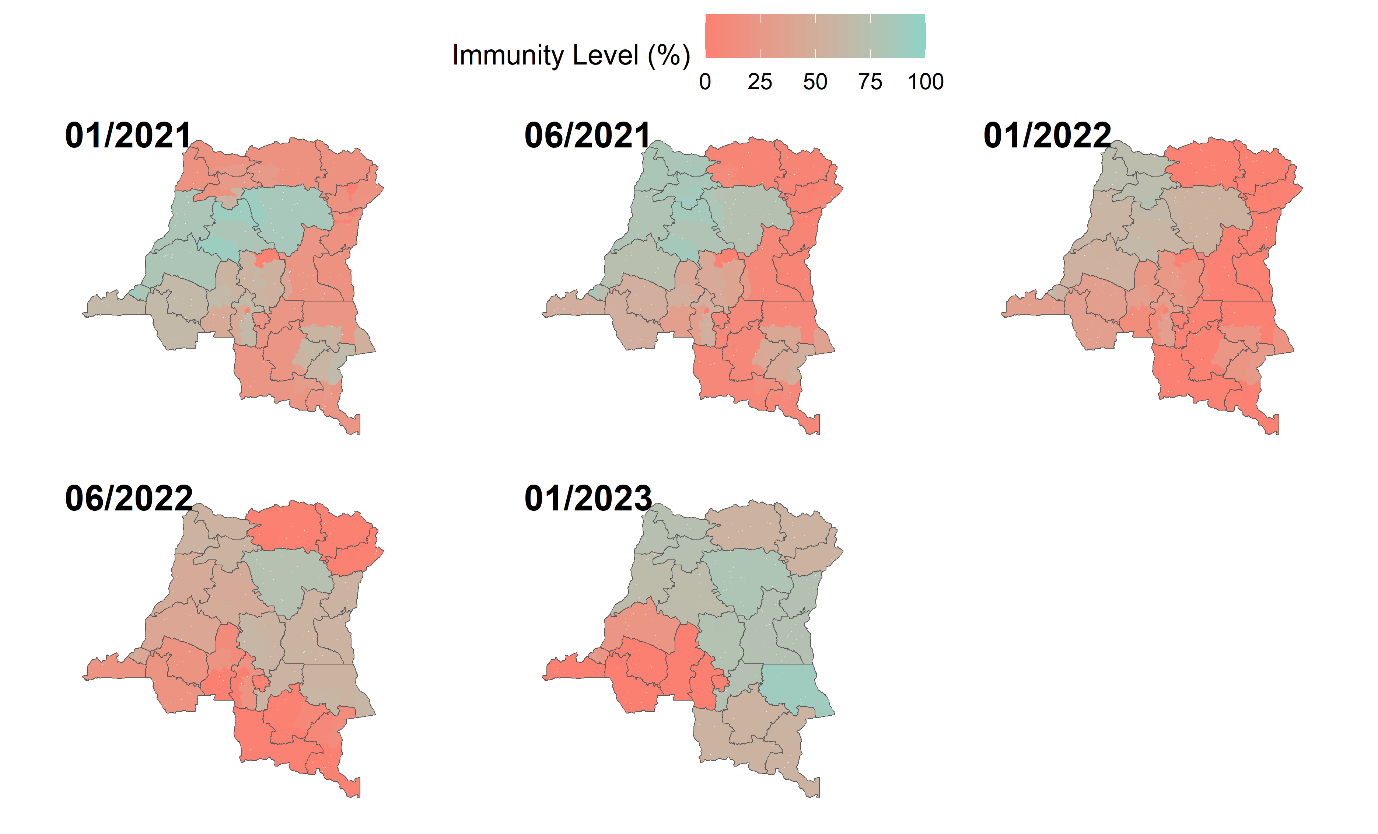


Supplementary Figure 3: Vaccine-induced immunity estimates for serotype 2 polio in the DRC over time.


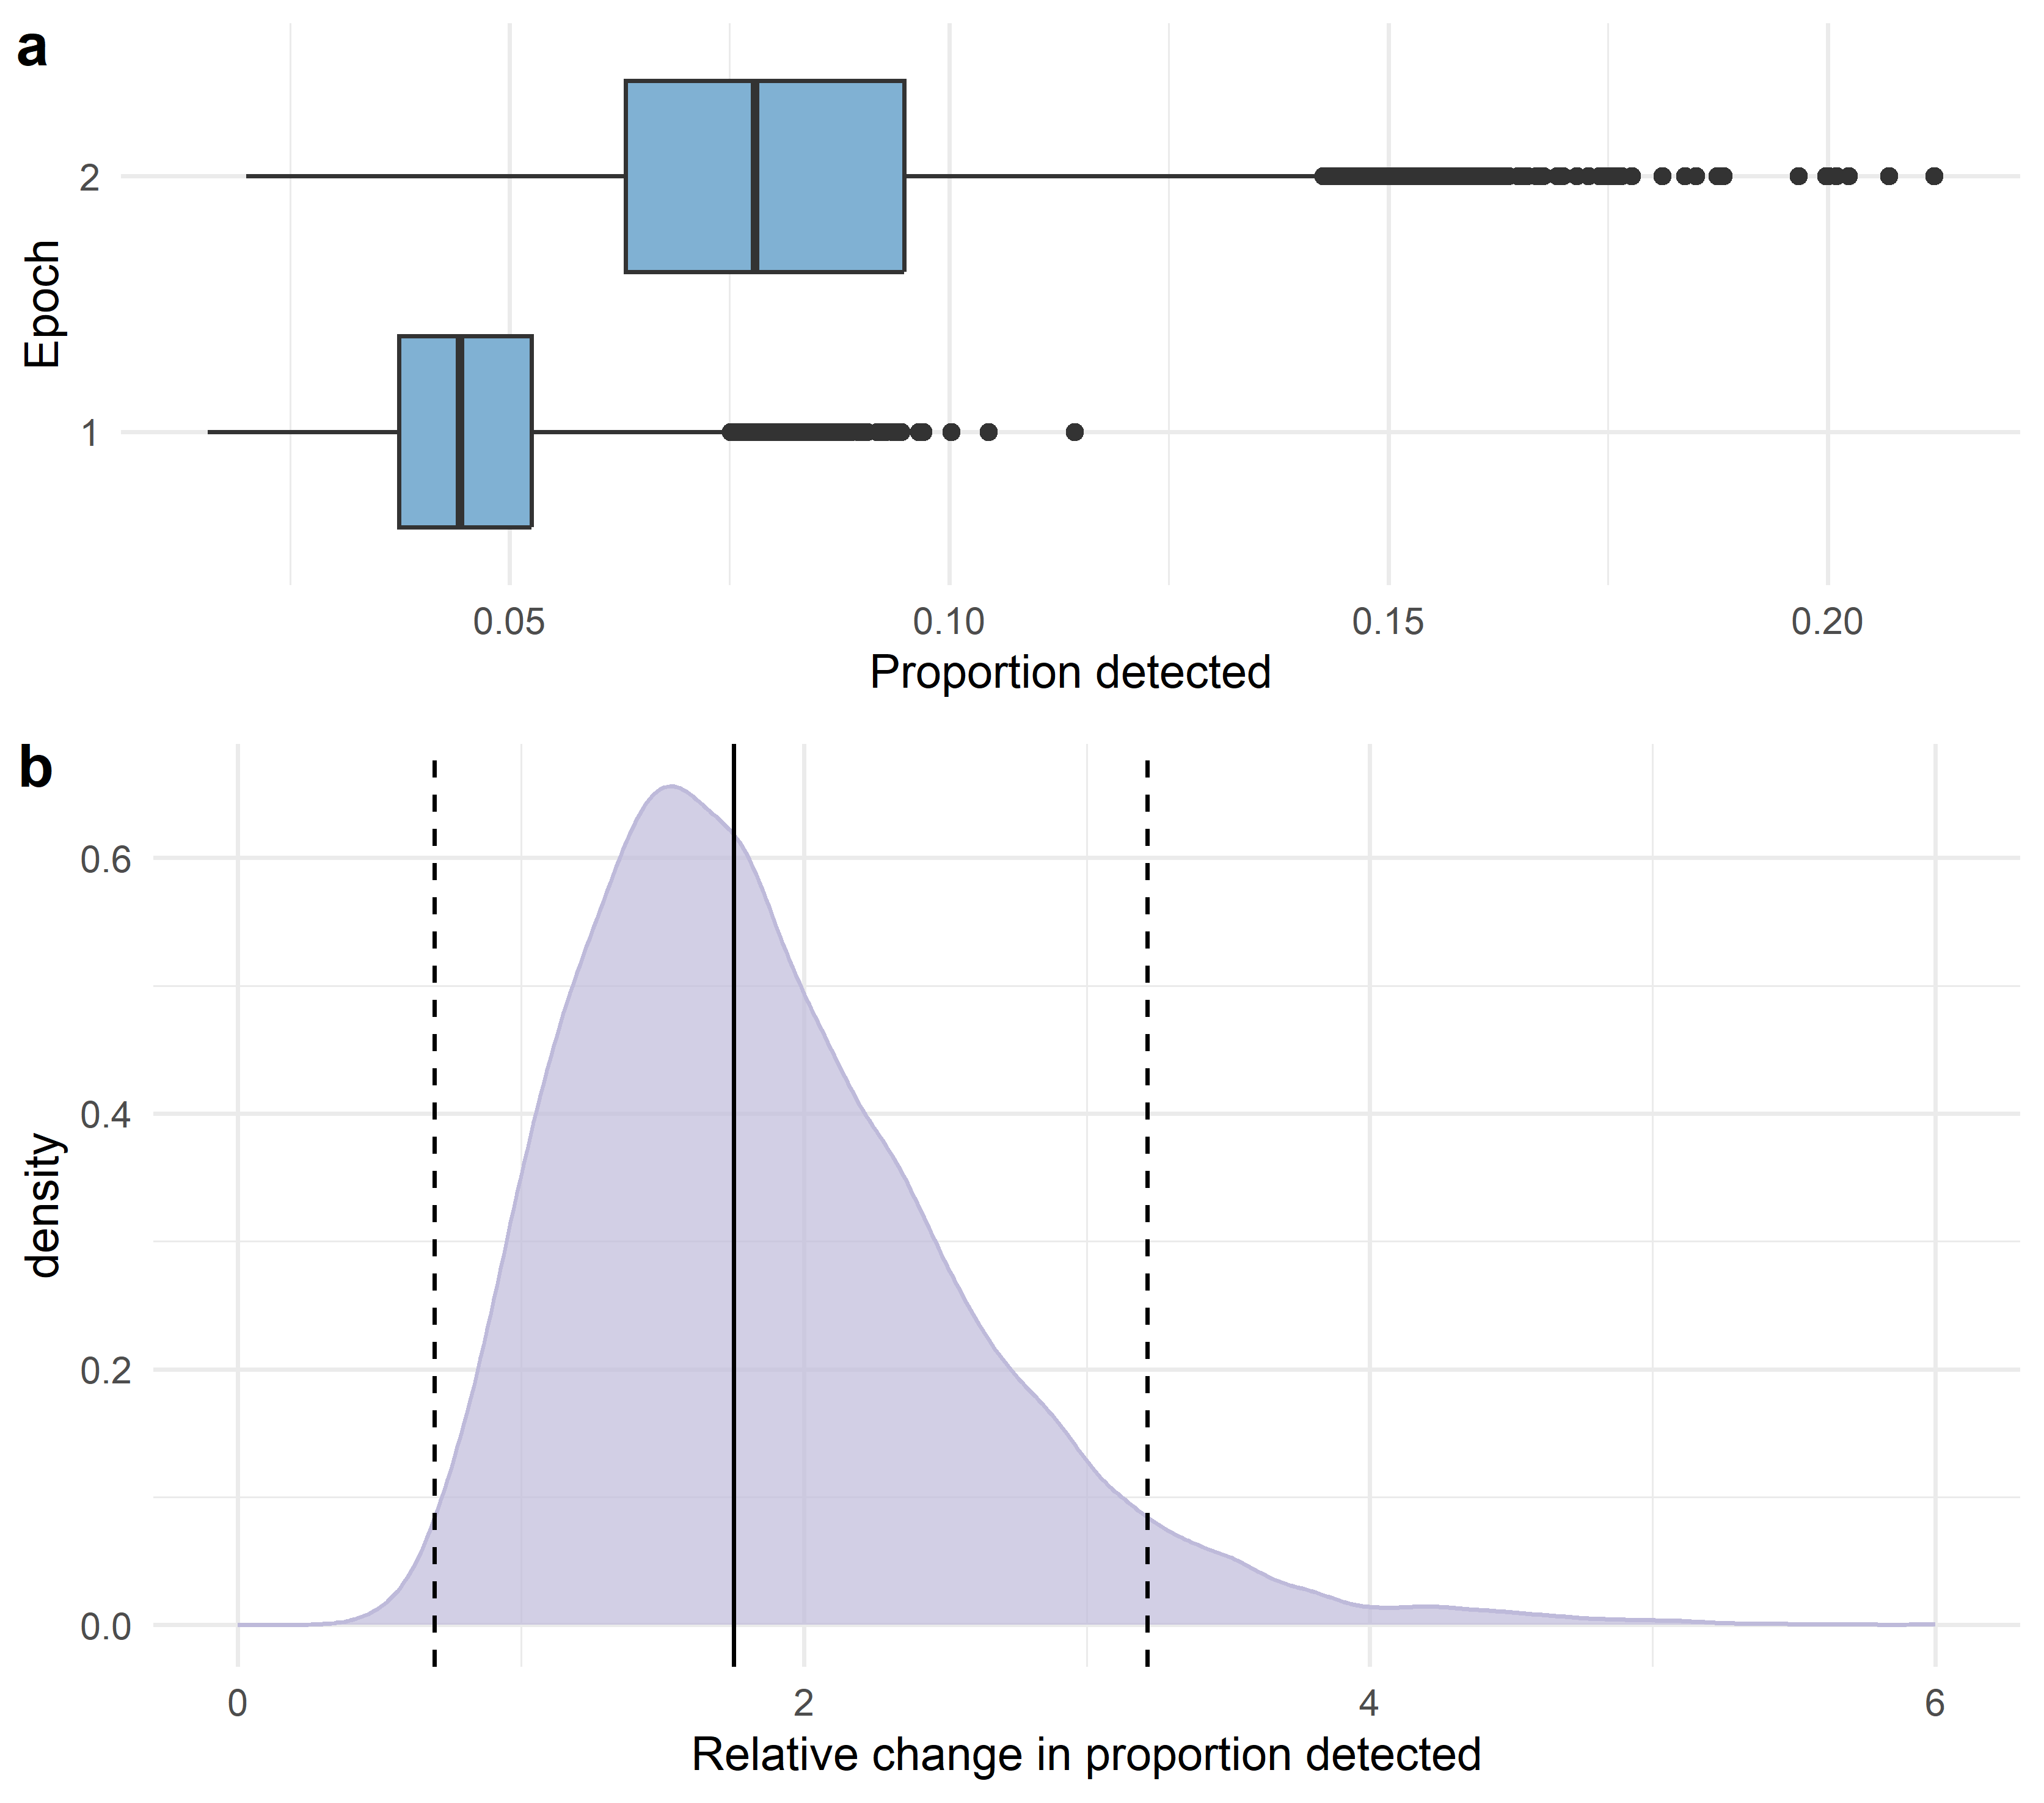


Supplementary Figure 4: (a) Estimated proportion of infections detected by AFP surveillance in sampling epochs 1 ([2021-11-10, 2022-05-01]) and 2 ([2022-05-01, 2023-01-23]). Boxplots show 1st, 2nd, and 3rd quantiles, with whiskers extending to furthest point not more than 1.5 interquartile ranges from the hinge. (b) Posterior density of the relative change in proportion of infections detected from sampling epoch 1 to sampling epoch 2. The median (1.75) is denoted by a solid line, and 95% HPD endpoints (0.693, 3.12) by dashed lines.


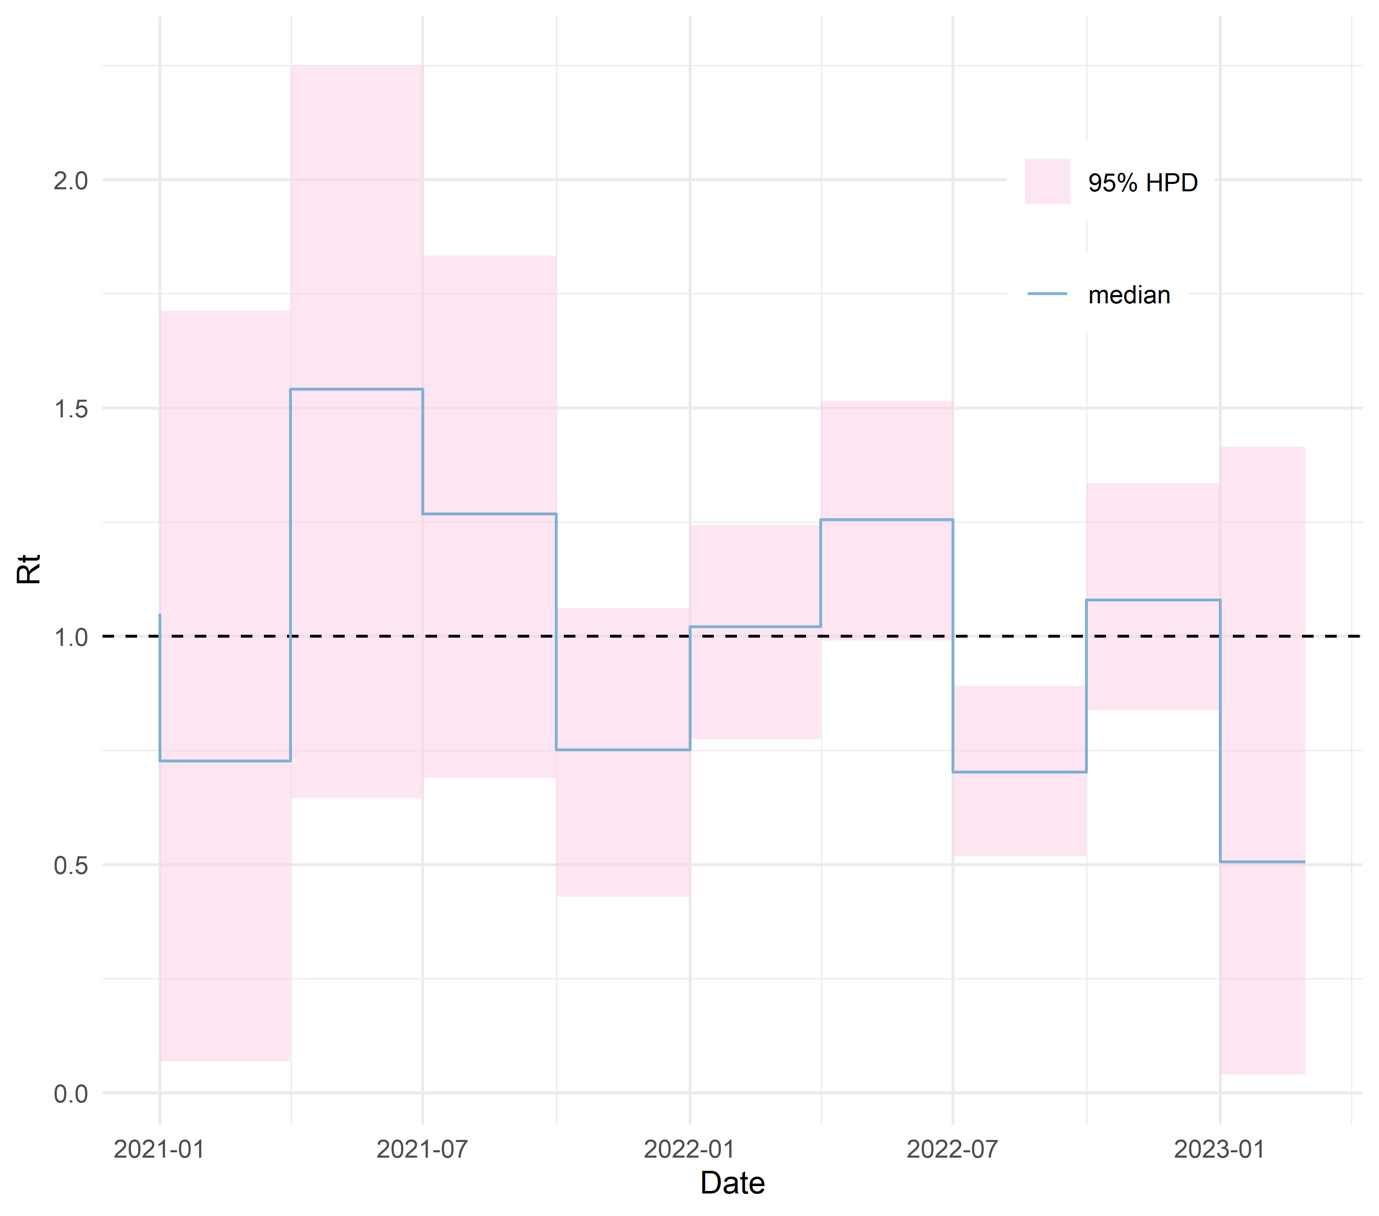


Supplementary Figure 4: Estimate of RDC-MAN-3 effective reproduction number over time from birth-death-sampling analysis


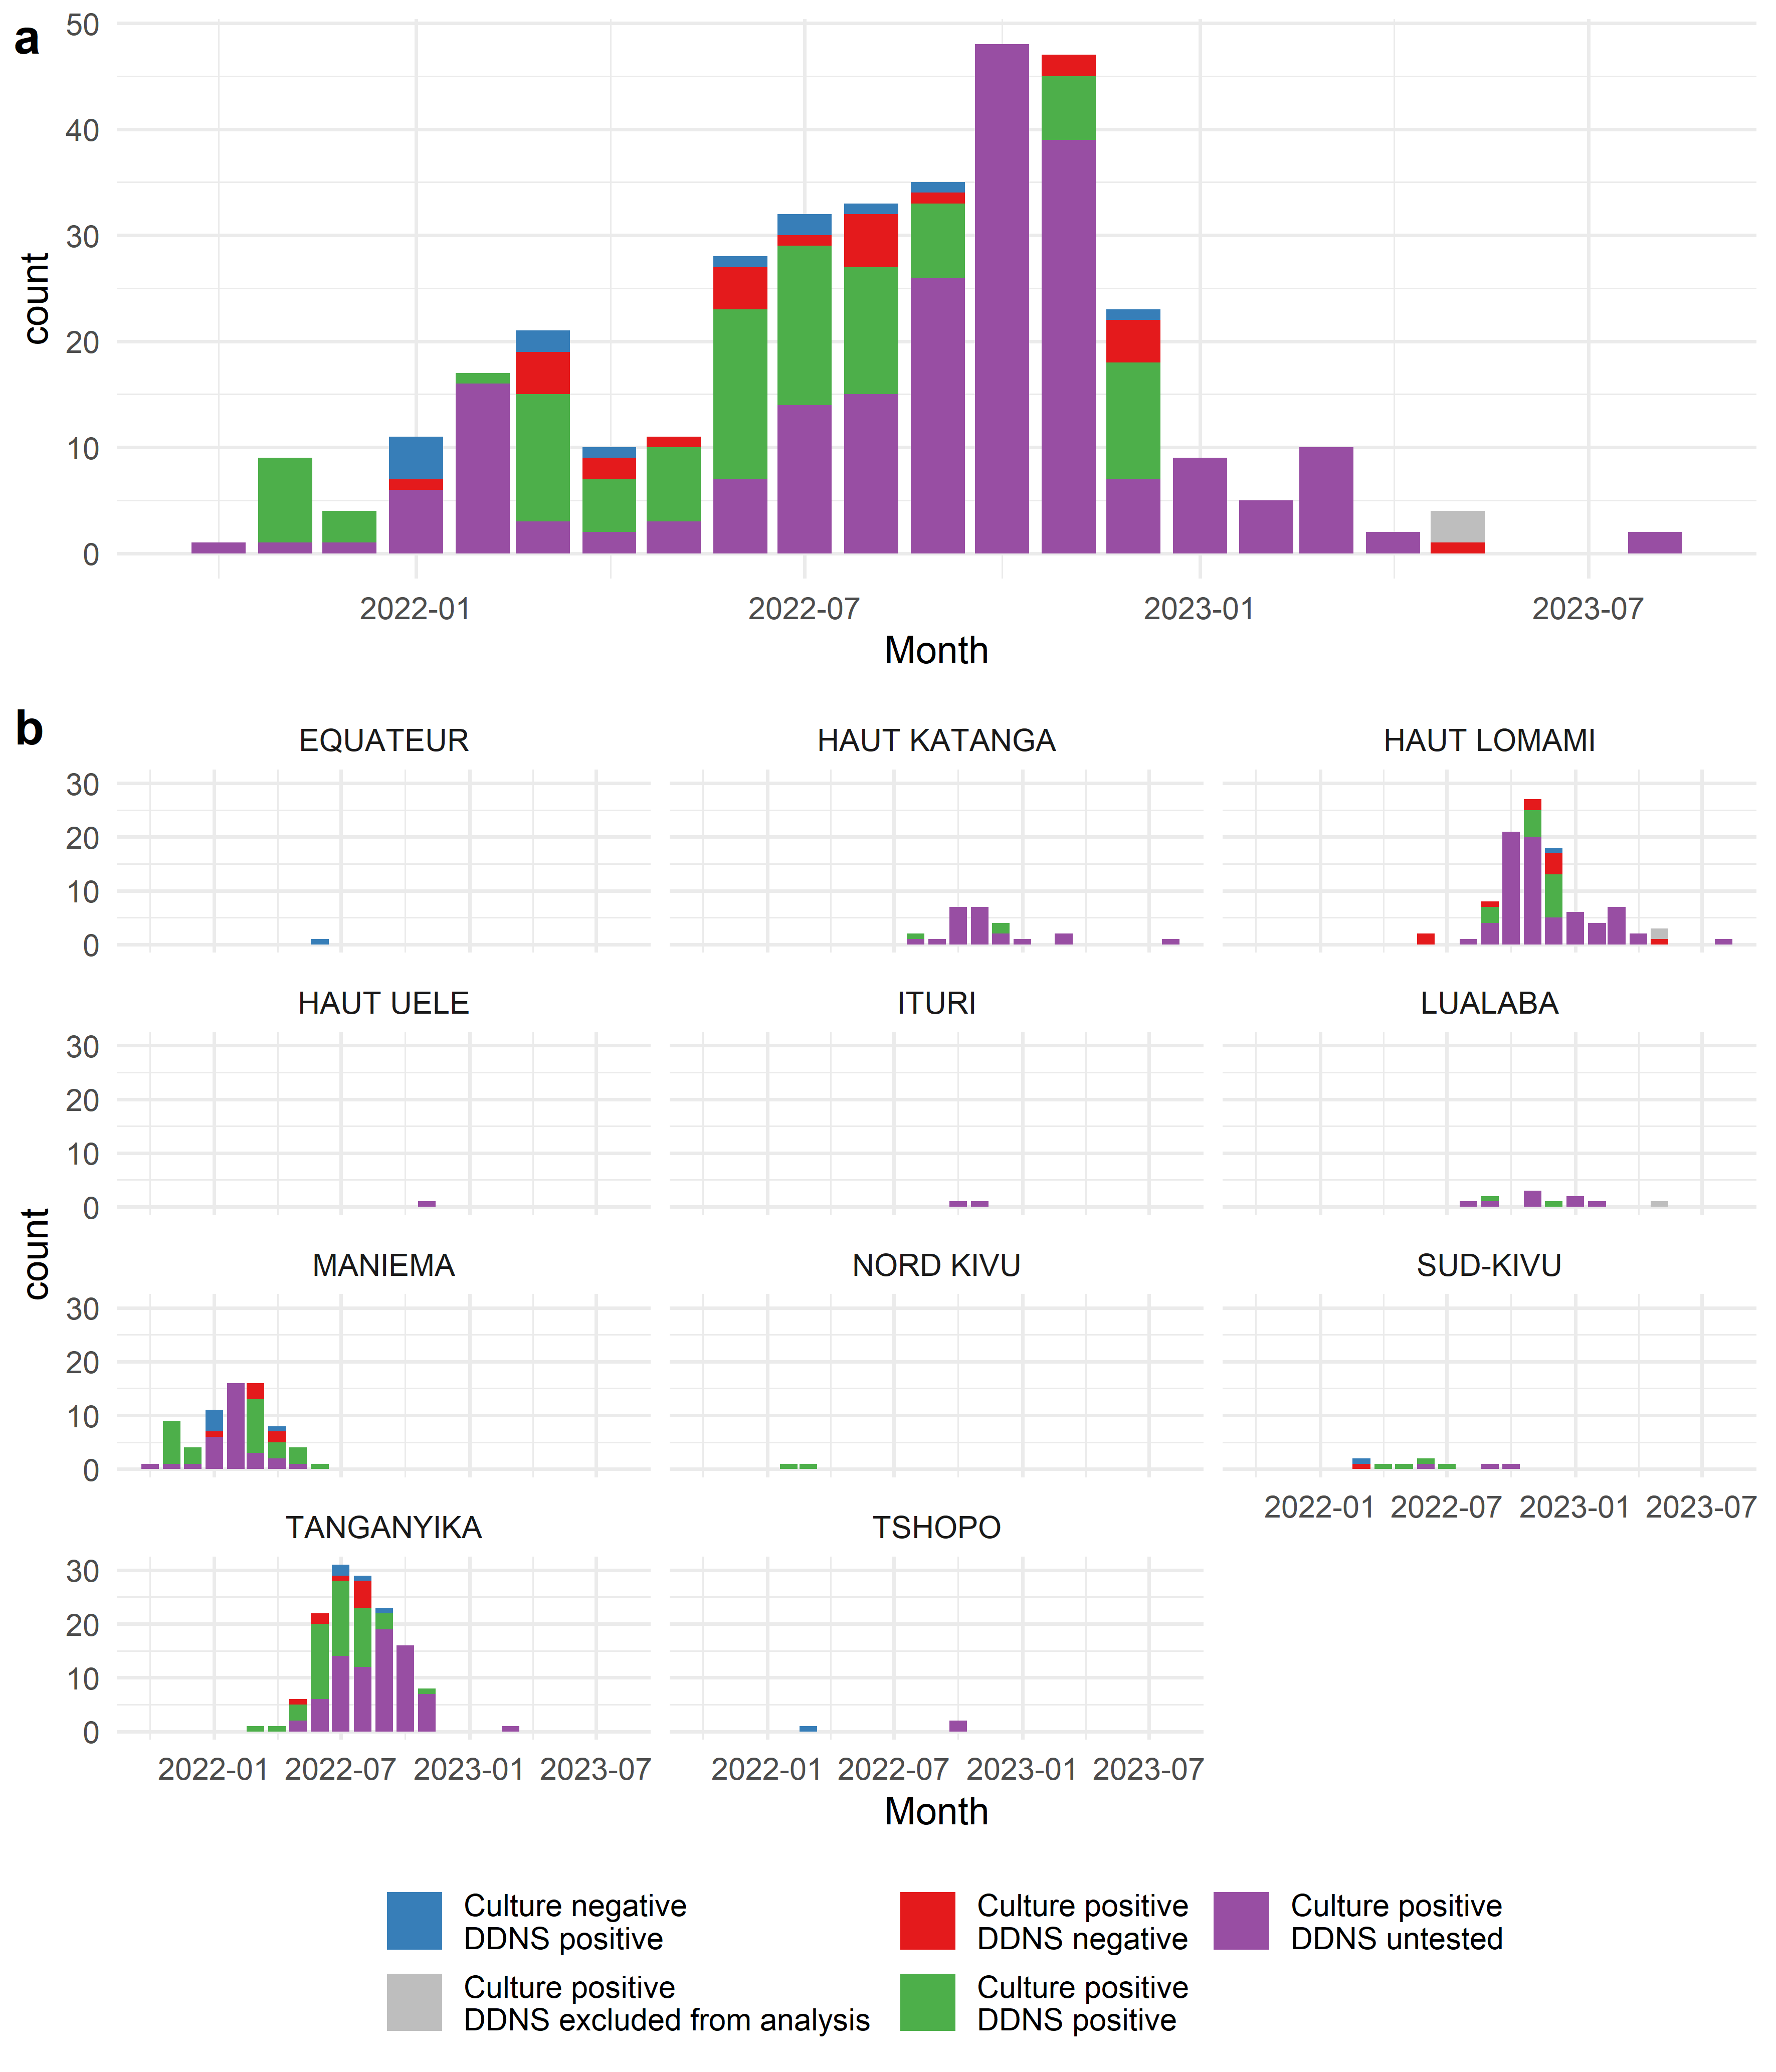


Supplementary Figure 5: Detailed timeseries of DDNS availability (a) aggregated over provinces, and (b) by province

**
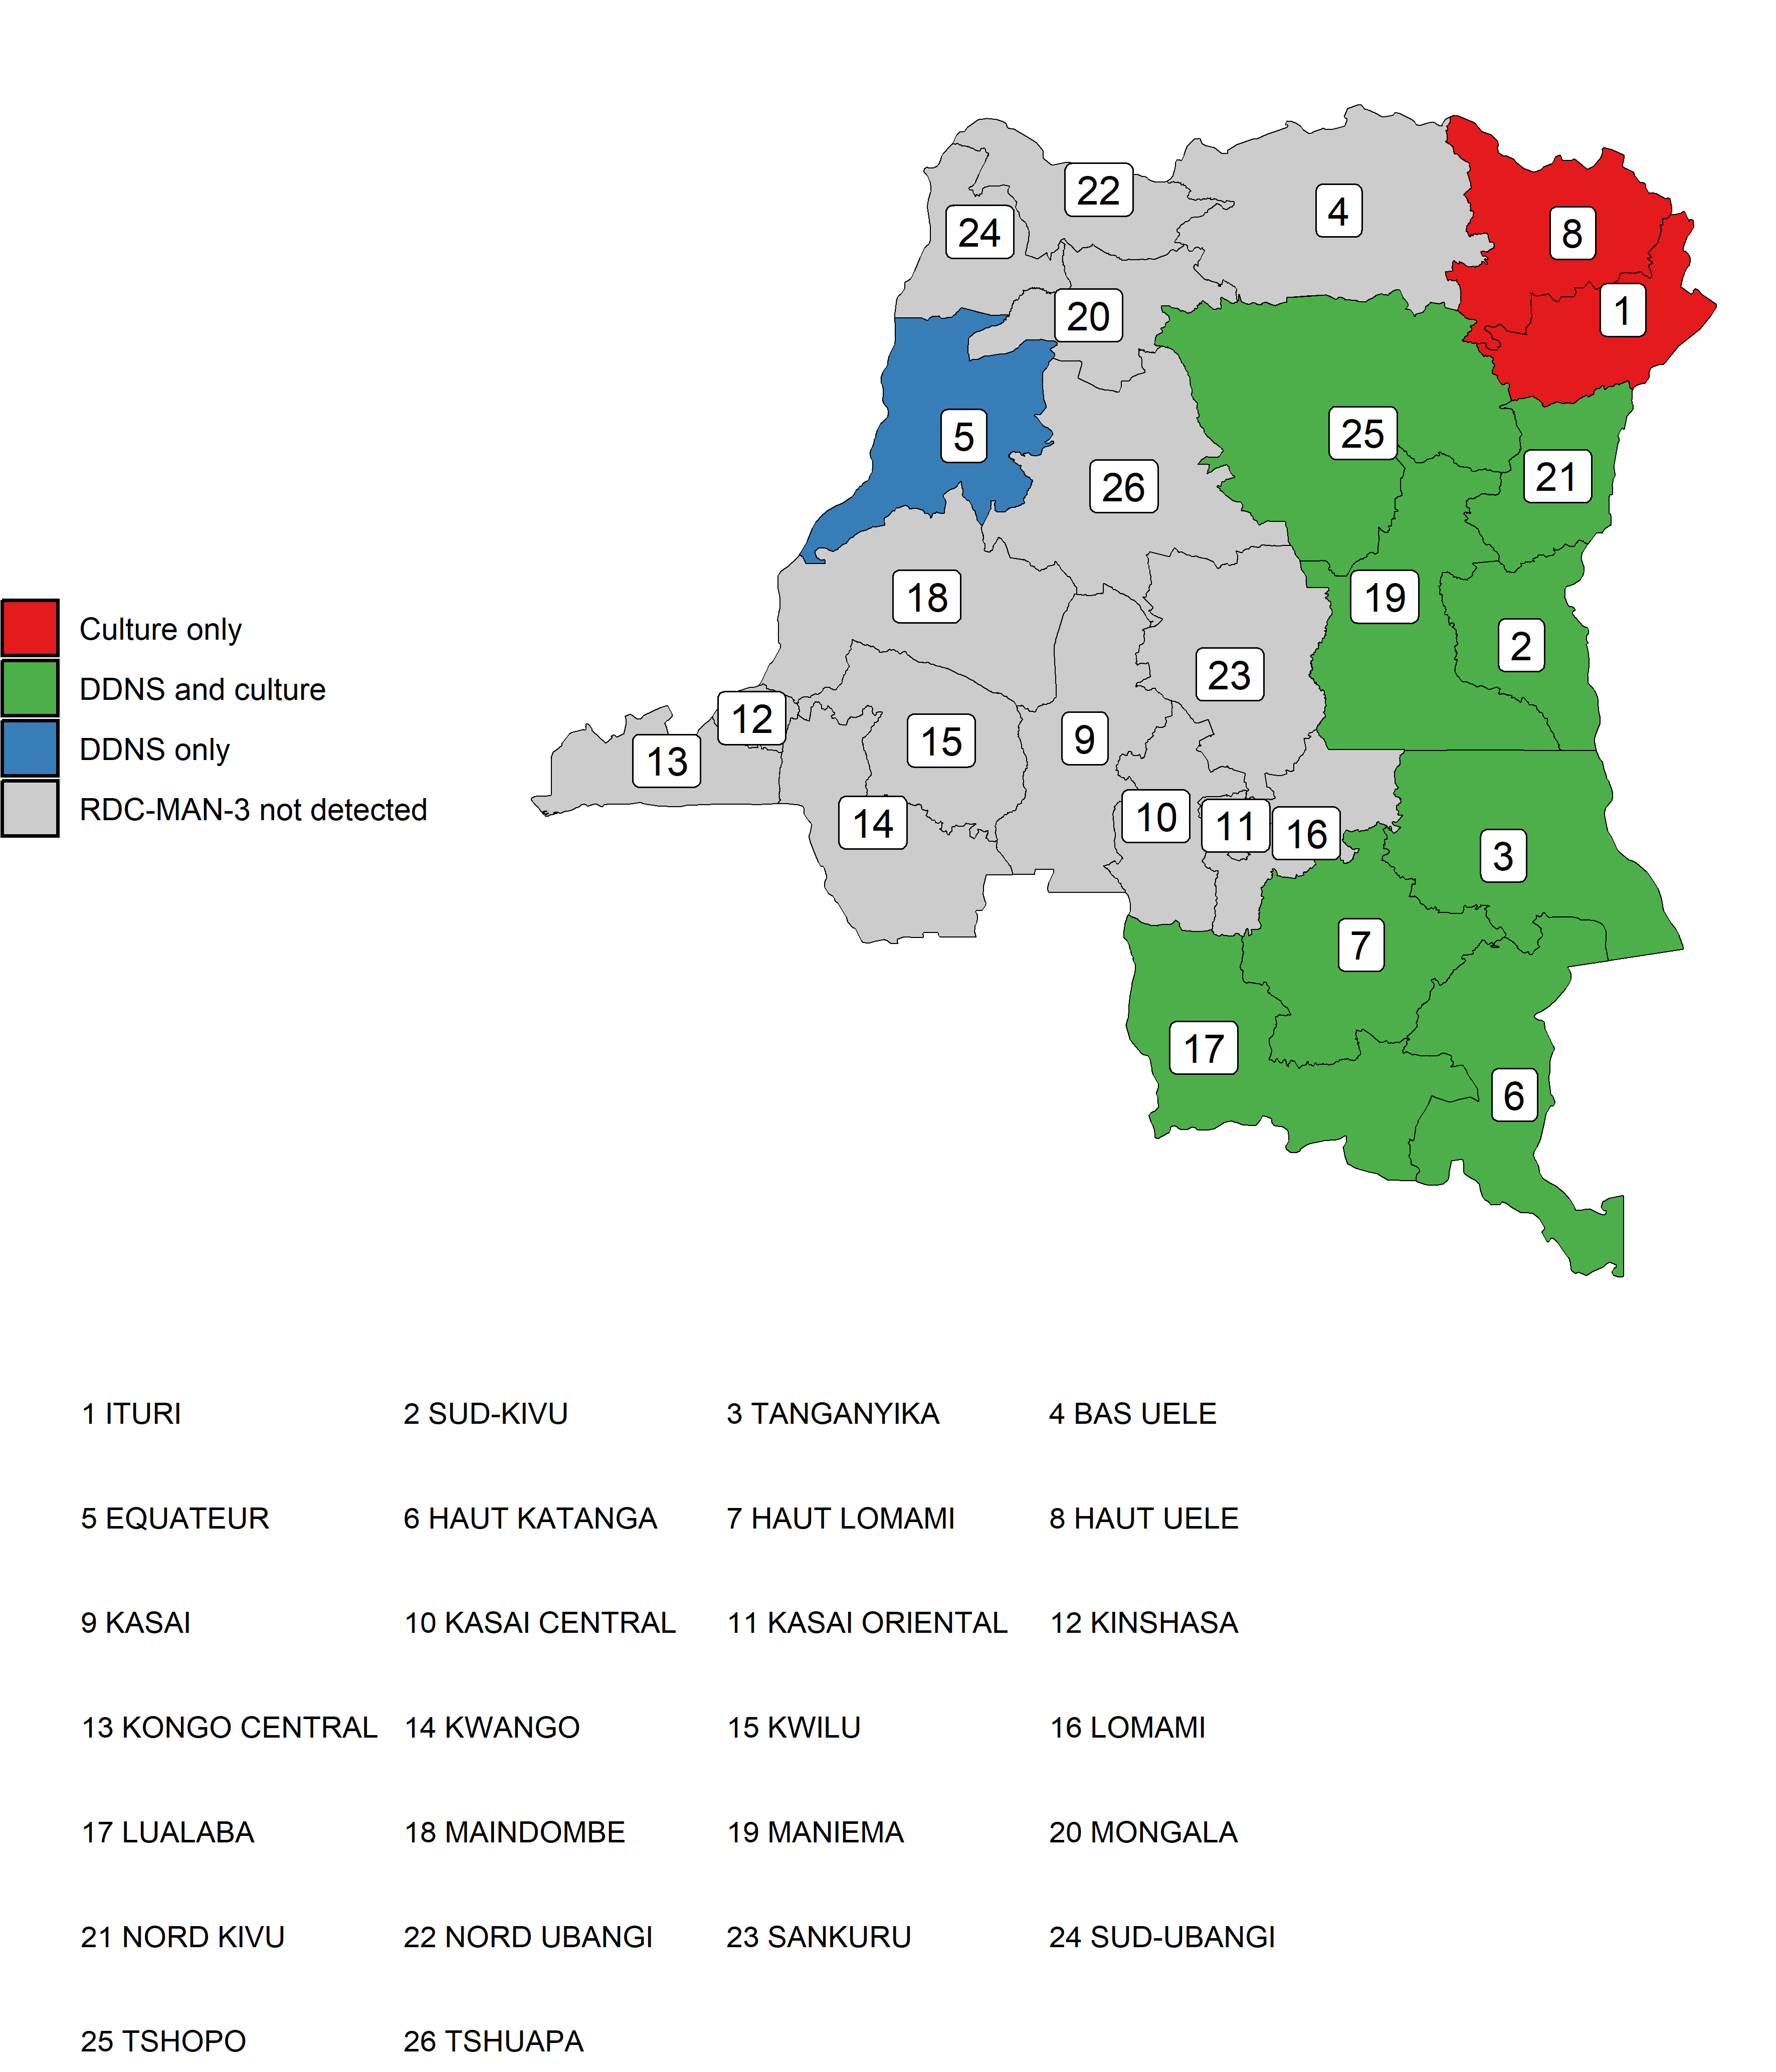
**

Supplementary Figure 6: Map of provinces of the DRC. Provinces are coloured by sequence availability from culture and DDNS methods.
